# Supplementary material
Source: HighWire-hosted journal article supplement (https://www.jpn.ca/highwire/filestream/89379/field_highwire_adjunct_files/0/jpn-190099-1-at.pdf)

**Appendix 1** to Zito GA, Andereg LB, Apazoglou K, et al. Transcranial magnetic stimulation over the right temporoparietal junction influences the sense of agency in healthy humans. *J Psychiatry Neurosci* 2020.

DOI: 10.1503/jpn.190099

Copyright © 2020 The Author(s) or their employer(s). To receive this resource in an accessible format, please contact us at [cmajgroup@cmaj.ca](mailto:cmajgroup@cmaj.ca).

*Online appendices are unedited and posted as supplied by the authors.*

Supplementary Figure 1. The Agency Task.

During the game, targets (X) and distractors (O) move down at constant speed. The task is to move the cursor (gray box) right or left in order to touch the targets while avoiding the distractors.

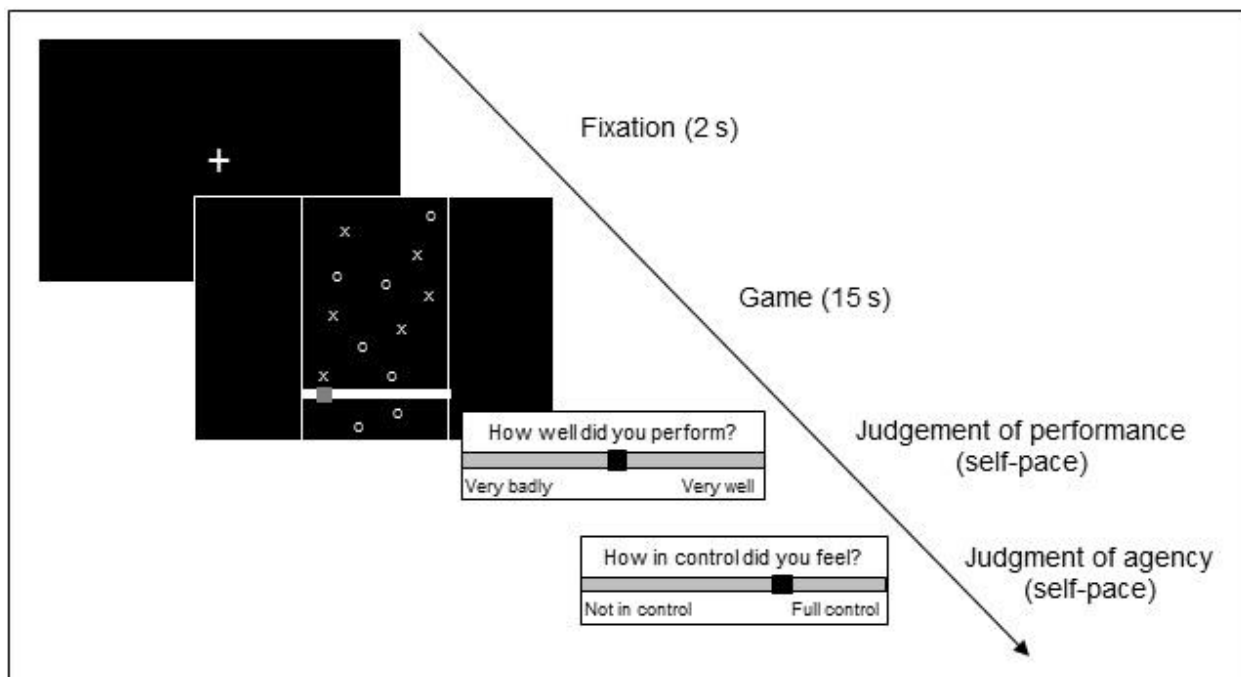

Supplementary Figure 2. Study design for Experiment 2.

Detailed tasks performed during Experiment 2.

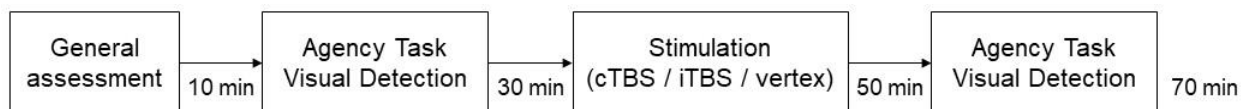

**Appendix 1** to Zito GA, Andereg LB, Apazoglou K, et al. Transcranial magnetic stimulation over the right temporoparietal junction influences the sense of agency in healthy humans. *J Psychiatry Neurosci* 2020.

DOI: 10.1503/jpn.190099

Online appendices are unedited and posted as supplied by the authors.

Supplementary Figure 3. Identification of the right temporo-parietal junction (rTPJ).

(A) The rTPJ in relation to the EEG electrodes. (B) The rTPJ on the head of a participant.

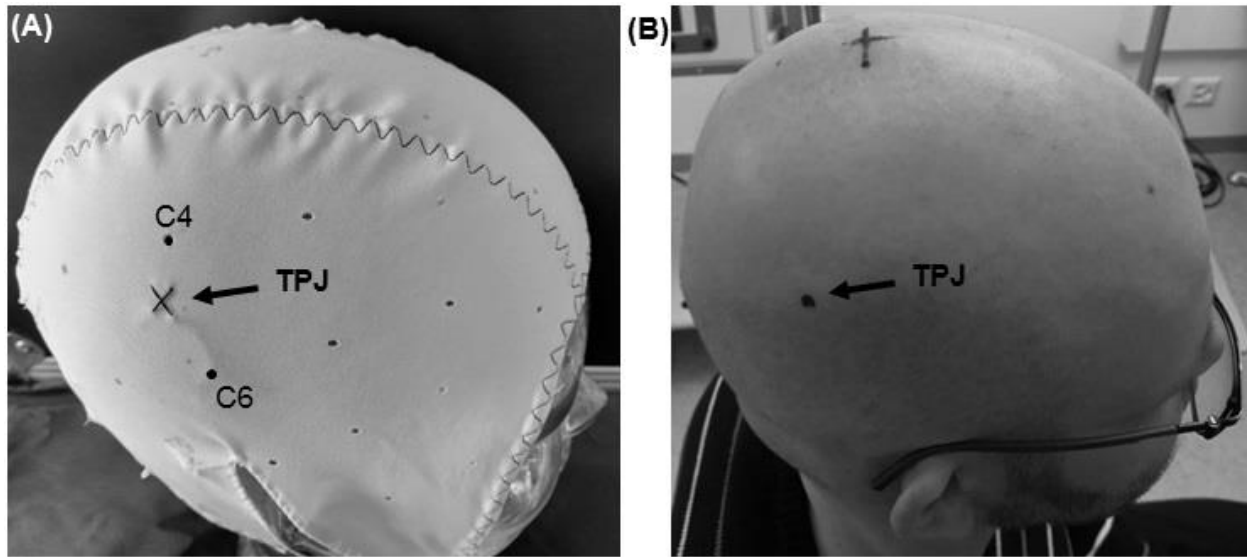

Supplementary Figure 4. Stimulation parameters for TMS.

(A) Inhibitory protocol for continuous theta burst stimulation (cTBS). (B) Excitatory protocol for intermittent theta burst stimulation (iTBS).

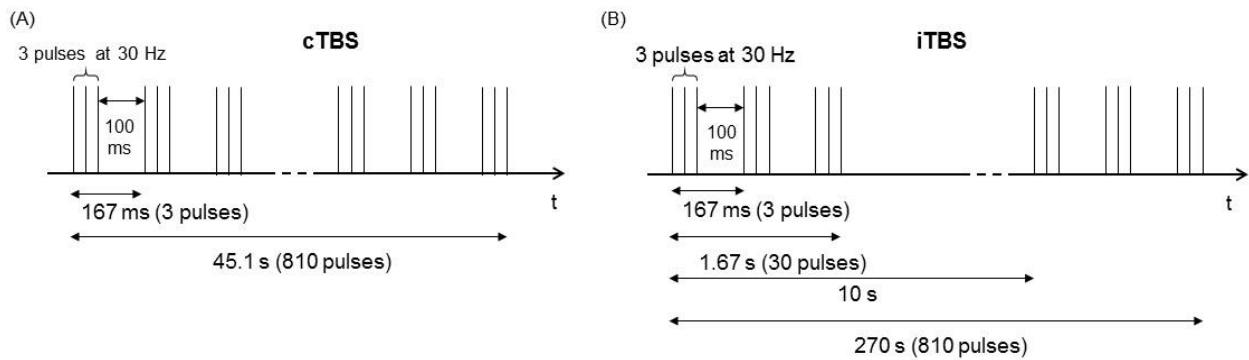

Supplement: jpn-190099-1-at.pdf [file jpn-190099-1-at.pdf]
